# Supplementary material for: TNF-Like Weak Inducer of Apoptosis Aggravates Left Ventricular Dysfunction after Myocardial Infarction in Mice
Source: Hindawi journal article supplement (doi:10.1155/2014/131950), 2014-01-01

**Suppl. Table 1:**

|                  |                                               |
|------------------|-----------------------------------------------|
| 18S rRNA_for     | 5'-TCA AGA ACG AAA GTC GGA GG-3'              |
| 18S rRNA_rev     | 5'-GGA CAT CTA AGG GCA TCA C-3'               |
| mouse_atp5o_for  | 5'-TCA TTT GGG TTT GAC CTA CAG CCG-3'         |
| mouse_atp5o_rev  | 5'-AGA CCT GAA CAG GGG GCC TTA C-3'           |
| mouse_β-MHC_for  | 5'-GCC AAC ACC AAC CTG TCC AAG TTC-3'         |
| mouse_β-MHC_rev  | 5'-TGC AAA GGC TCC AGG TCT GAG GGC-3'         |
| mouse_BNP_for    | 5'-ATC TCC TGC AGG TGC TGT CCC AG-3'          |
| mouse_BNP_rev    | 5'-GGT CTT CCT ACA ACA ACT TCA GTG CGT TAC-3' |
| mouse_cox5b_for  | 5'-TGC TCA GCC TGT TCC CGG AAG T-3'           |
| mouse_cox5b_rev  | 5'-CAT CAG TGG GGA CAC CAC CTC CA-3'          |
| mouse_cycs_for   | 5'-CCA CGG TCT GTT CGG GCG G-3'               |
| mouse_cycs_rev   | 5'-CCT CTC CCC AGG TGA TGC CTT TGT-3'         |
| mouse_Fn14_for   | 5'-GTC TTG GGA TTC GGC TTG-3'                 |
| mouse_Fn14_rev   | 5'-GCA GAA GTC GCT GTG TGG T-3'               |
| mouse_ndufb5_for | 5'-CTG CAG CGG GCT TCG GTC TC-3'              |
| mouse_ndufb5_rev | 5'-TGC CGC ACA GGA GCG ACA GT -3'             |
| mouse_PGC-1α_for | 5'-CCC GTG GAT GAA GAC GGA TTG-3'             |
| mouse_PGC-1α_rev | 5'-GTG GGT GTG GTT TGC TGC ATG-3'             |
| mouse_PPARα_for  | 5'-AGC TGG TGT AGC AAG TG-3'                  |
| mouse_PPARα_rev  | 5'-TCT GCT TTC AGT TTT GCT TT-3'              |
| mouse_TWEAK_for  | 5'-AGG AGG AGC TGA CAG-3'                     |
| mouse_TWEAK_rev  | 5'-CCT CAT AAT GGG CTG-3'                     |

|                         |                                       |
|-------------------------|---------------------------------------|
| rat_atp5o_for           | 5'-TGT CCC GAC AGG TGC GGA GT-3'      |
| rat_atp5o_rev           | 5'-CGC AGC AGA GTA CAG GGC GG-3'      |
| rat_cox5b_for           | 5'-GTA GGC GCT TTG GCG GCT CA-3'      |
| rat_cox5b_rev           | 5'-GGG ACA CCA CCT CCA GAA GCC A-3'   |
| rat_cycs_for            | 5'-CTT GGG CTA GAG AGC GGG ACG-3'     |
| rat_cycs_rev            | 5'-TTA AAT TCG GTC CGG GCT GGT CAA-3' |
| rat_ndufb5_for          | 5'-GCT TCG GTC GCC GCT CTG AC-3'      |
| rat_ndufb5_rev          | 5'-GCA CAG GAG CGA CAG TCT TCG G-3'   |
| rat_PGC-1 $\alpha$ _for | 5'-CAC CAA ACC CAC AGA GAA CAG-3'     |
| rat_PGC-1 $\alpha$ _rev | 5'-GGT GAC TCT GGG GTC AGA-3'         |

**Suppl. Table 2:**

|                                              |                                 |
|----------------------------------------------|---------------------------------|
| Akt Antibody                                 | Cell Signaling, Danvers, USA    |
| GSK-3 $\beta$ Antibody                       | Cell Signaling, Danvers, USA    |
| P44/42 MAPK (Erk 1/2) Antibody               | Cell Signaling, Danvers, USA    |
| Phospho-Akt (Ser473) Antibody                | Cell Signaling, Danvers, USA    |
| Phospho-p44/42 MAPK (Thr202/Tyr204) Antibody | Cell Signaling, Danvers, USA    |
| Phospho-GSK-3 $\beta$ (Ser9) Antibody        | Cell Signaling, Danvers, USA    |
| TWEAK Antibody                               | Santa Cruz, Heidelberg, Germany |
| Fn14 Antibody                                | Santa Cruz, Heidelberg, Germany |
| PGC-1 $\alpha$ Antibody                      | abcam, Cambridge, UK            |
| Phospho-NF $\kappa$ B-p65 (Ser536) Antibody  | Cell Signaling, Danvers, USA    |
| $\alpha$ -Tubulin Antibody                   | Sigma-Aldrich, München, Germany |

Suppl. Fig 1

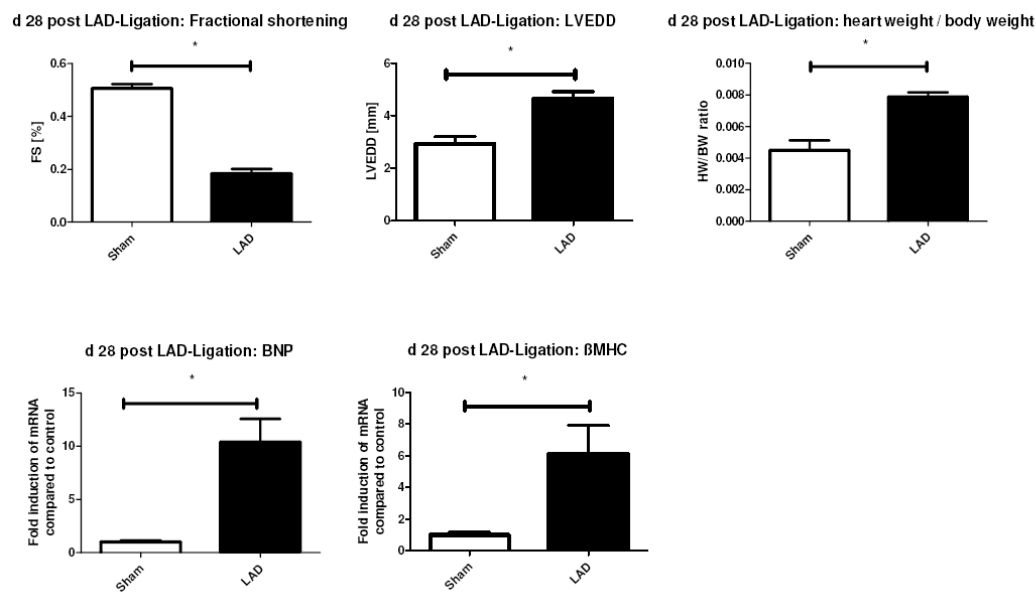

Supplement: f1 [file 131950.f1.pdf]
